# Supplementary material for: Exploring the Potential of Plant Bioactive Compounds against Male Infertility: An In Silico and In Vivo Study
Source: MDPI journal article supplement (doi:10.3390/molecules28237693), 2023-11-21
Supplement: s1 [file s1]

# Exploring the Potential of Plant Bioactive Compounds Against Male Infertility: An In Silico and In Vivo Study

Muhammad Jahangeer <sup>1</sup>, Ghulam Mustafa <sup>1,\*</sup>, Naveed Munir <sup>2</sup>, Sibtain Ahmed <sup>3,4</sup> and Khalid Mashai Al-Anazi <sup>5</sup>

<sup>1</sup> Department of Biochemistry, Government College University Faisalabad, Faisalabad 38000, Pakistan; rajahangeer@gcuf.edu.pk

<sup>2</sup> School of Health Sciences, Department of Biomedical Laboratory Sciences, University of Management and Technology, Lahore 54782, Pakistan; naveed.munir@umt.edu.pk

<sup>3</sup> Scripps Institution of Oceanography, University of California San Diego, 9500 Gilman Drive, La Jolla, CA 92093, USA; sibtain@ucsd.edu

<sup>4</sup> Department of Biochemistry, Bahauddin Zakariya University, Multan 60800, Pakistan

<sup>5</sup> Department of Zoology, College of Science, King Saud University, Riyadh 11451, Saudi Arabia; kalanzi@ksu.edu.sa

\* Correspondence: drghulammustafa@gcuf.edu.pk

## Supporting information

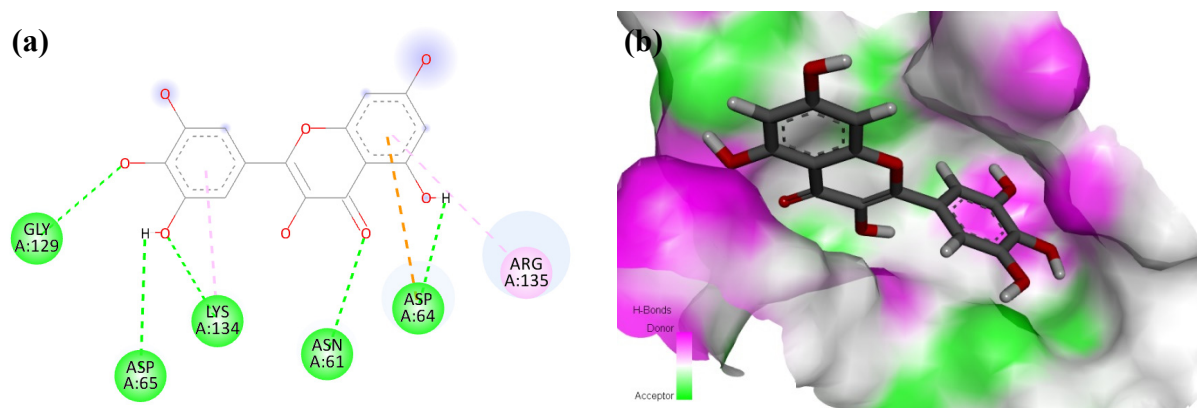

Figure S1. Interaction (a) and binding pattern (b) of myricetin with sex hormone-binding globulin as the receptor.

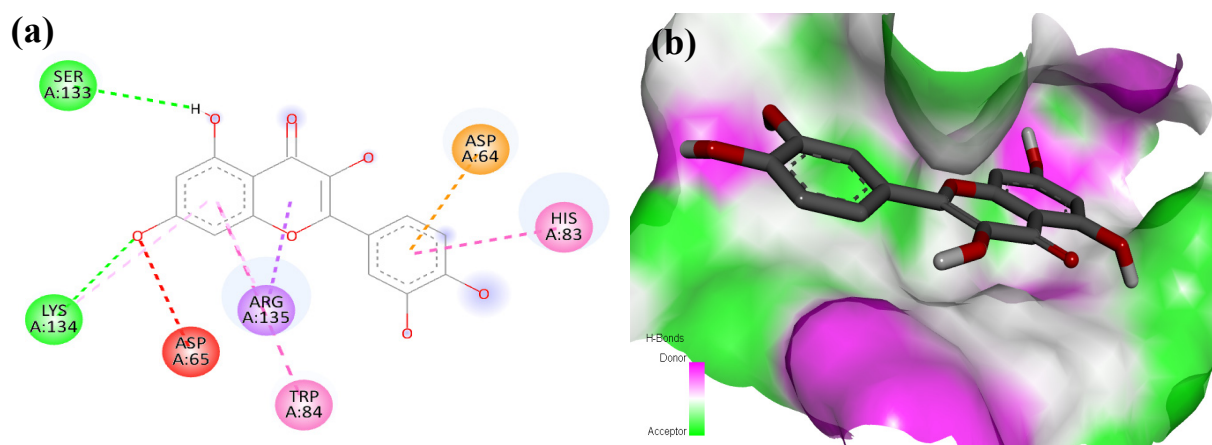

Figure S2. Interactions (a) and binding patterns (b) of quercetin with SHBG as a receptor protein.

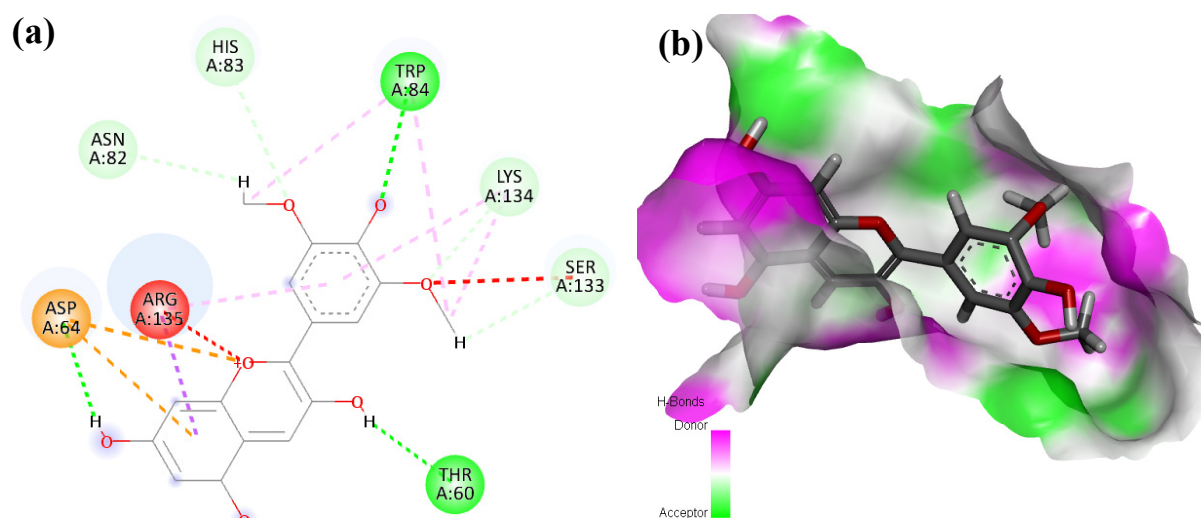

Figure S3. Interactions (a) and binding patterns (b) of malvidin with SHBG as a receptor protein.

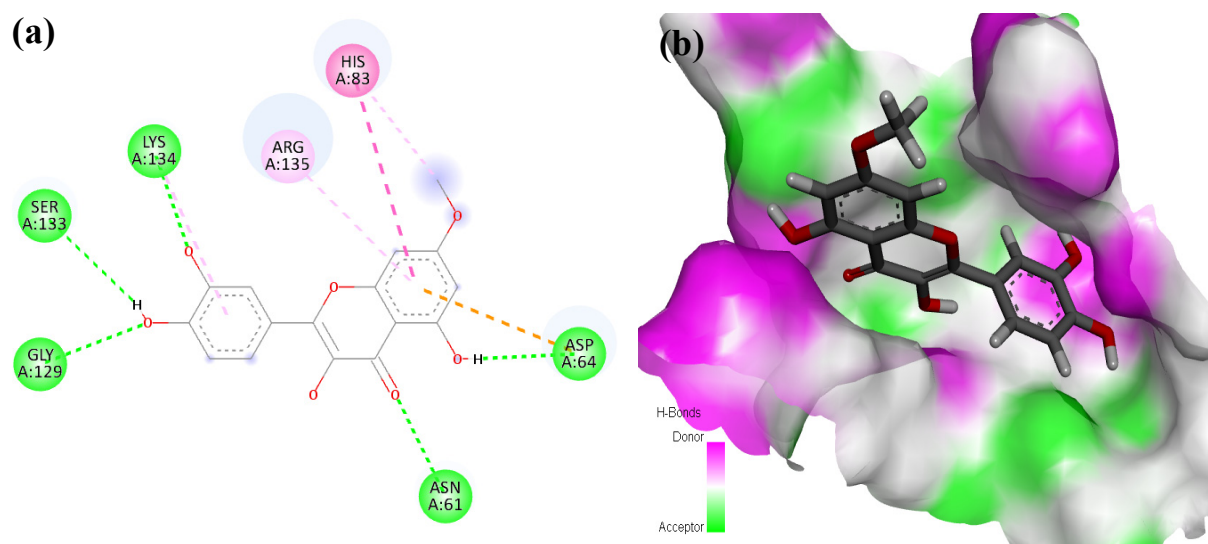

Figure S4. Interactions (a) and binding patterns (b) of rhamnetin with SHBG as a receptor protein.

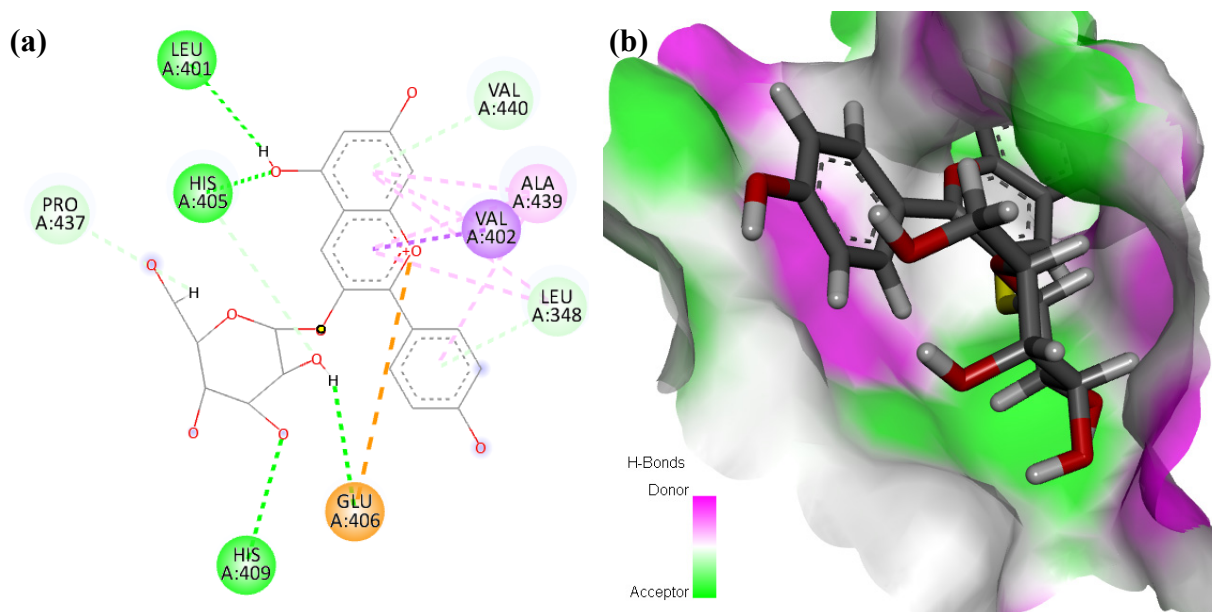

Figure S5. Interaction (a) and binding pattern (b) of callistephin with disintegrin and metalloproteinase 17 (ADAM17) as the receptor.

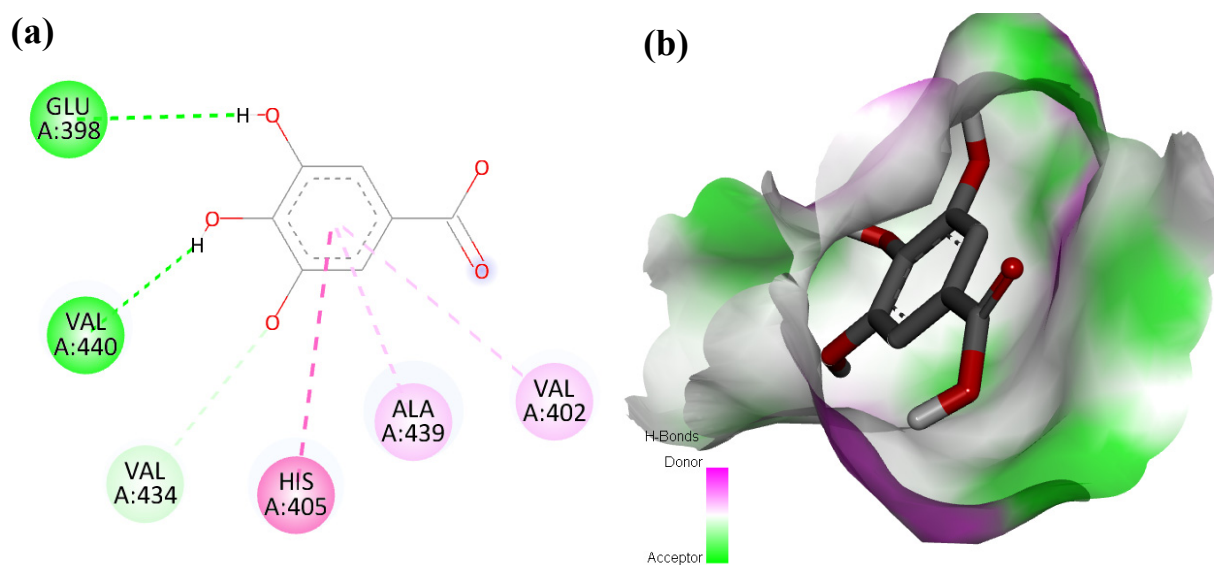

Figure S6. Interactions (a) and binding patterns (b) of gallic acid with ADAM17 as a receptor protein.

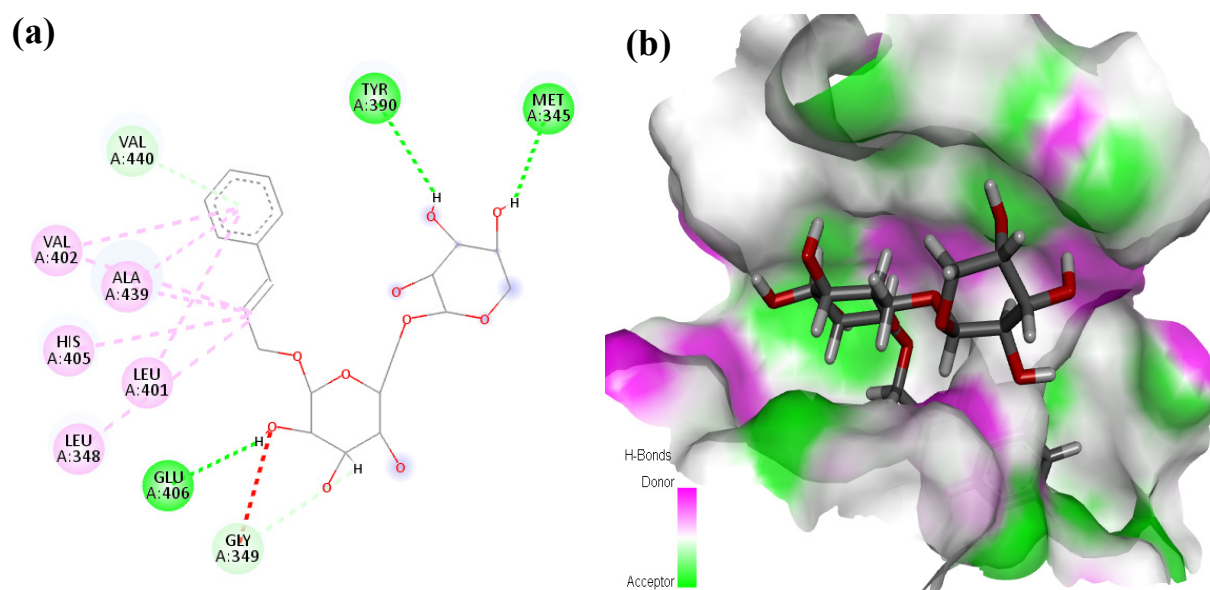

Figure S7. Interactions (a) and binding patterns (b) of rosavin with ADAM17 as a receptor protein.

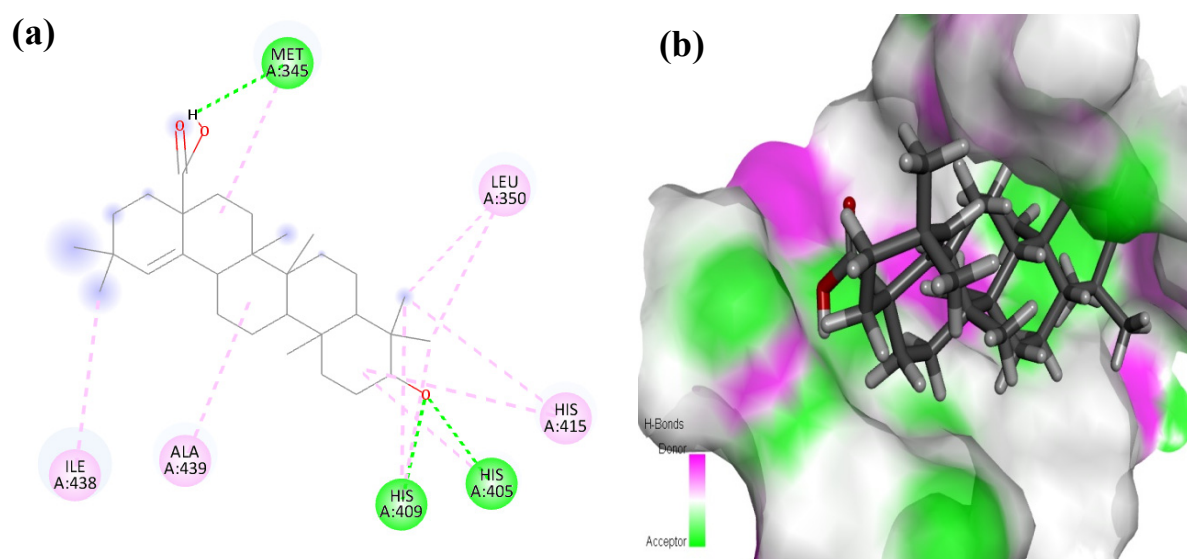

Figure S8. Interactions (a) and binding patterns (b) of moronic acid with ADAM17 as a receptor protein.



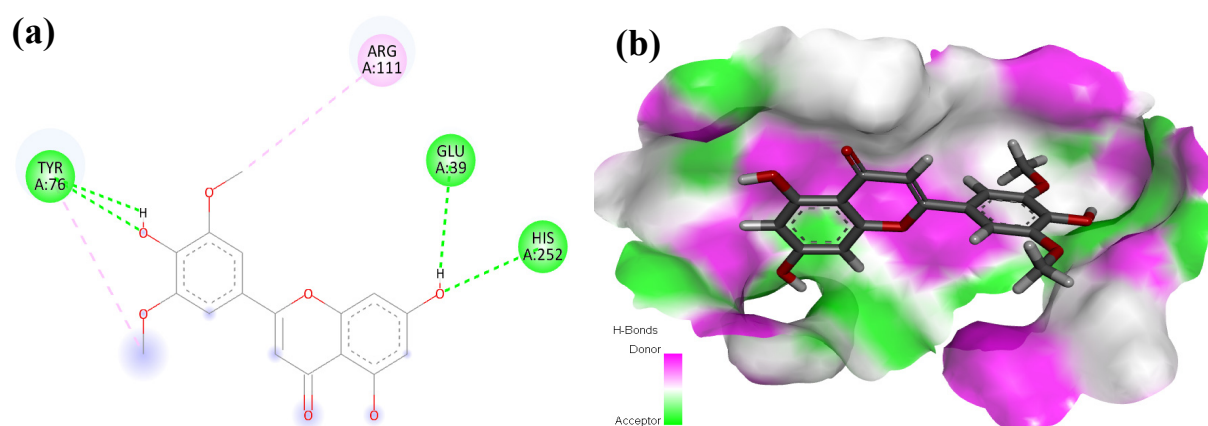

Figure S9. Interactions (a) and binding patterns (b) of tricetin with DNaseI as a receptor protein.

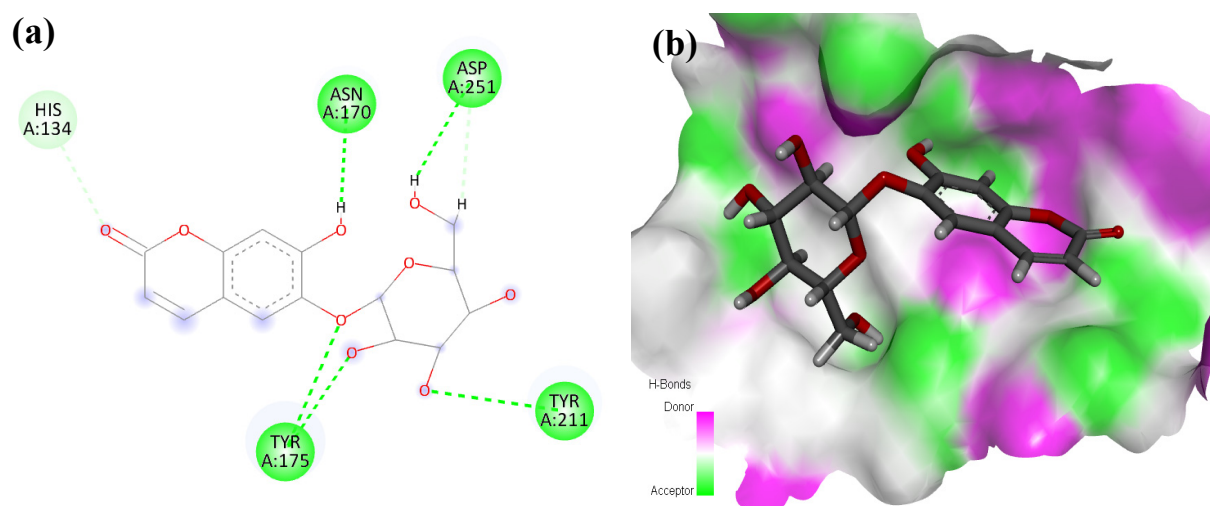

Figure S10. Interactions (a) and binding patterns (b) of esculetin with DNaseI as a receptor protein.

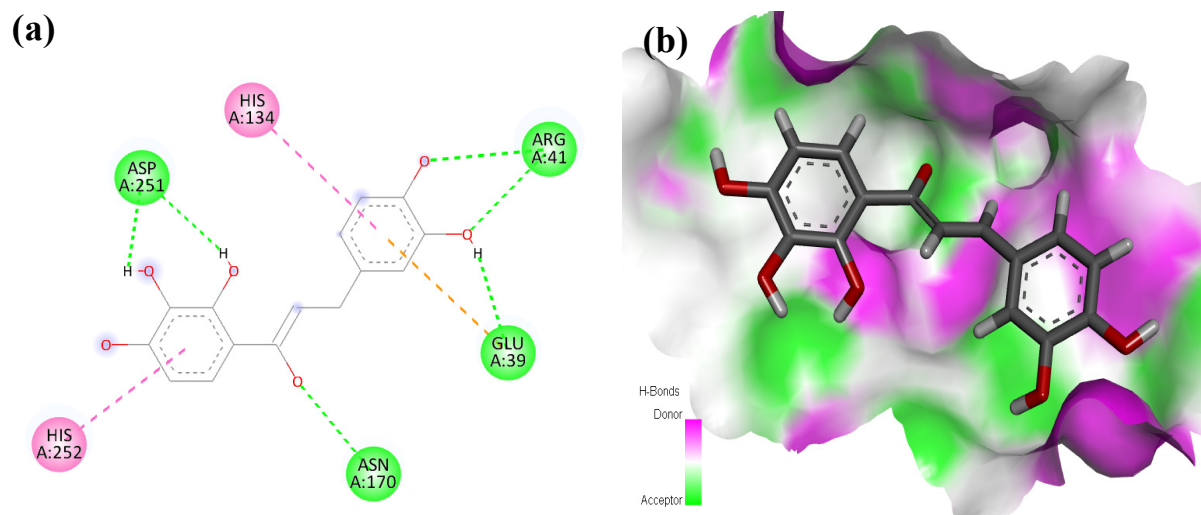

Figure S11. Interactions (a) and binding patterns (b) of okanin with DNaseI as a receptor protein.

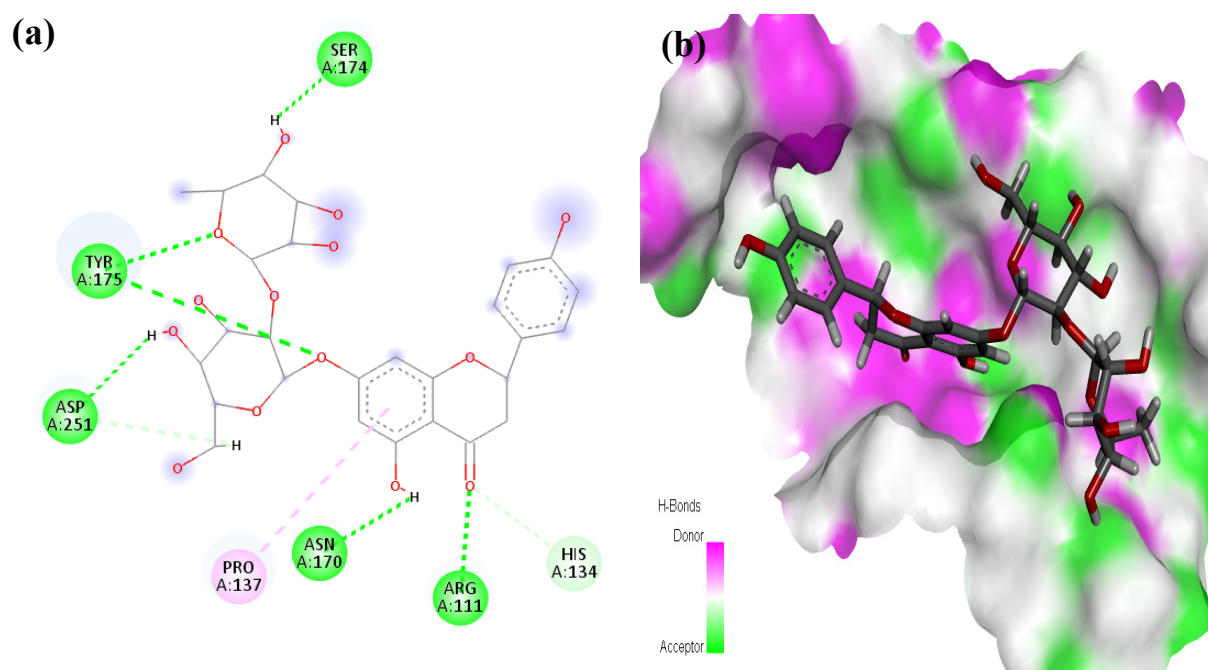

Figure S12. Interactions (a) and binding patterns (b) of naringin with DNaseI as a receptor protein.

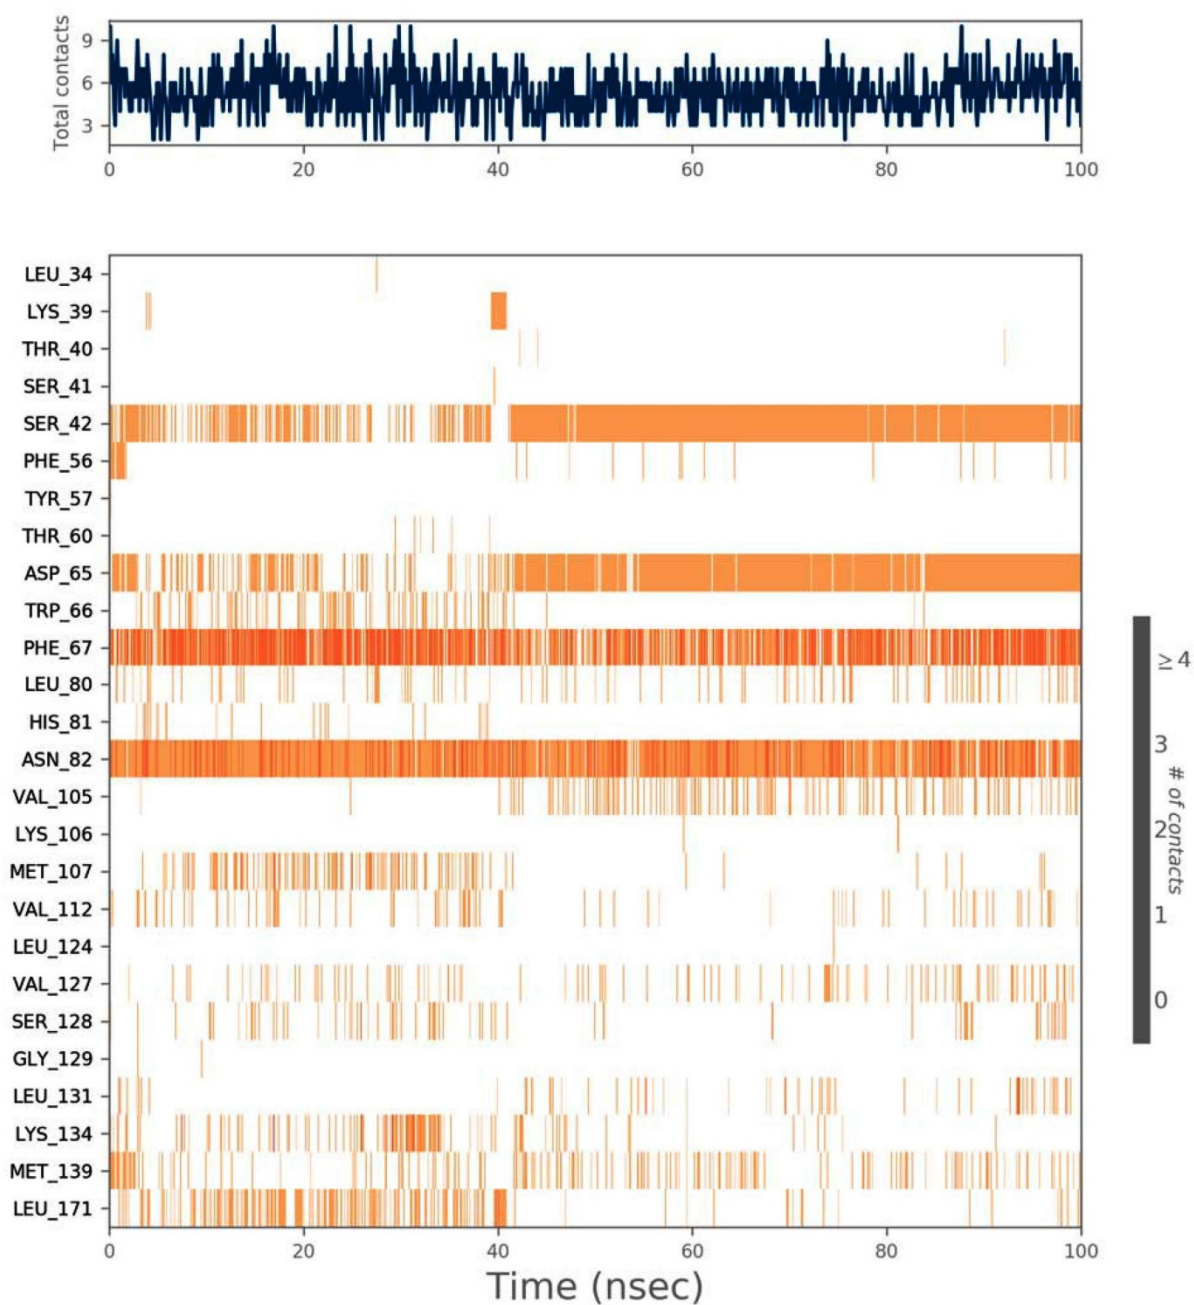

Figure S13. Hydrogen bond interaction stability (consistency) of key residues of SHBG protein with triclin.

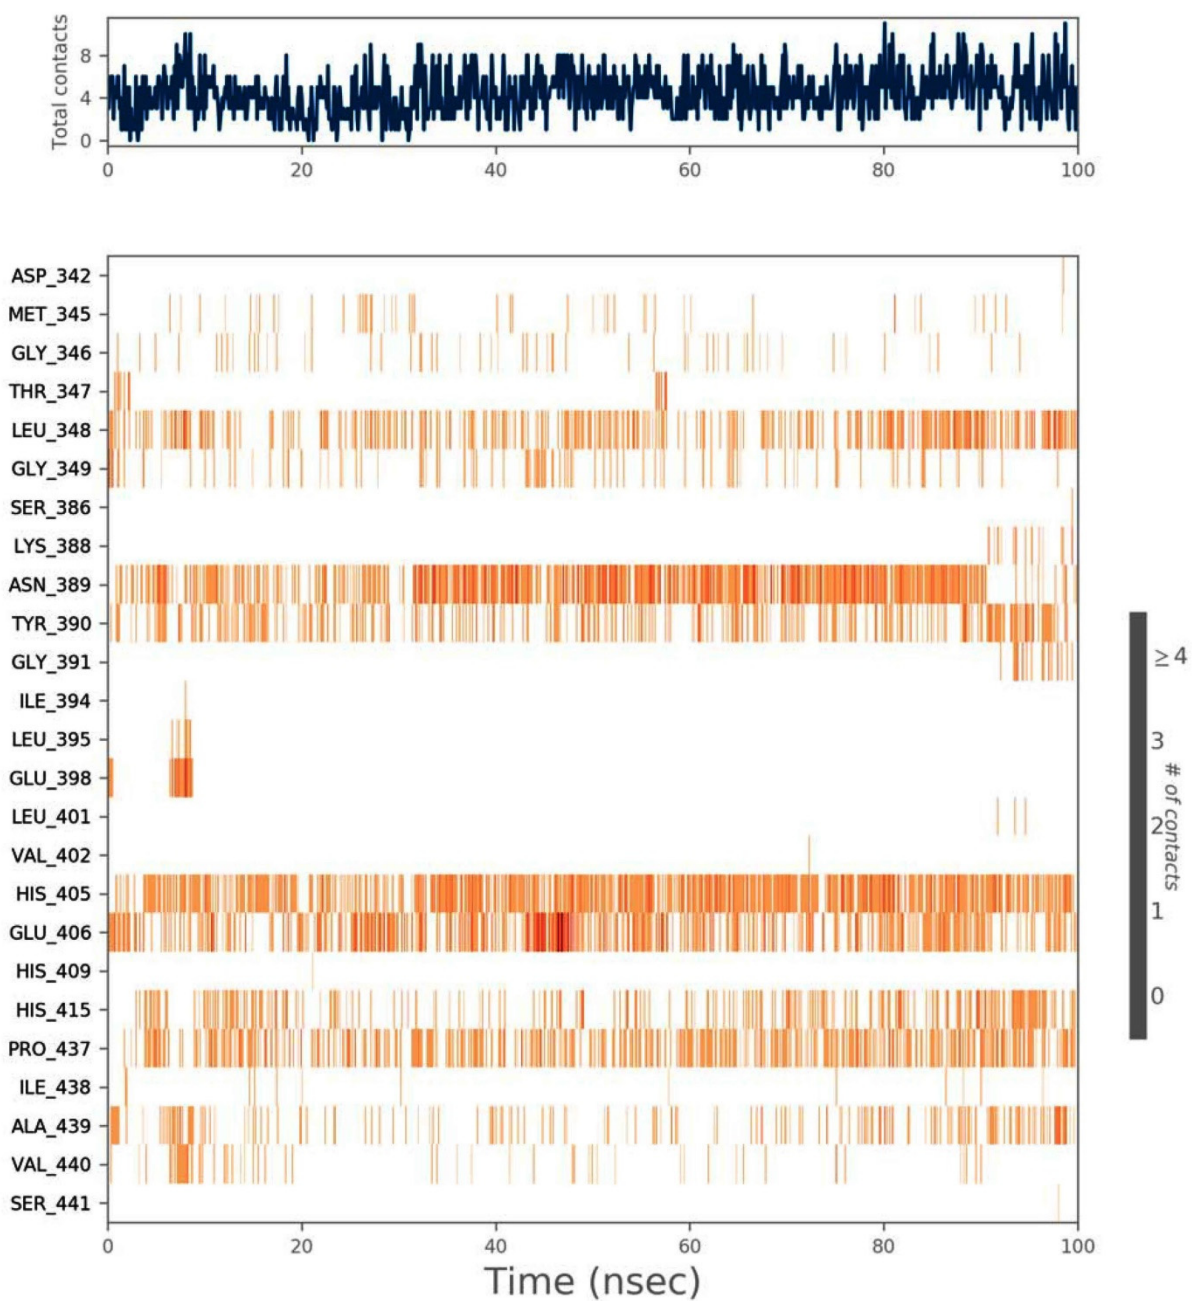

Figure S14. Hydrogen bond interaction stability (consistency) of key residues of the ADAM17 protein with tricin.



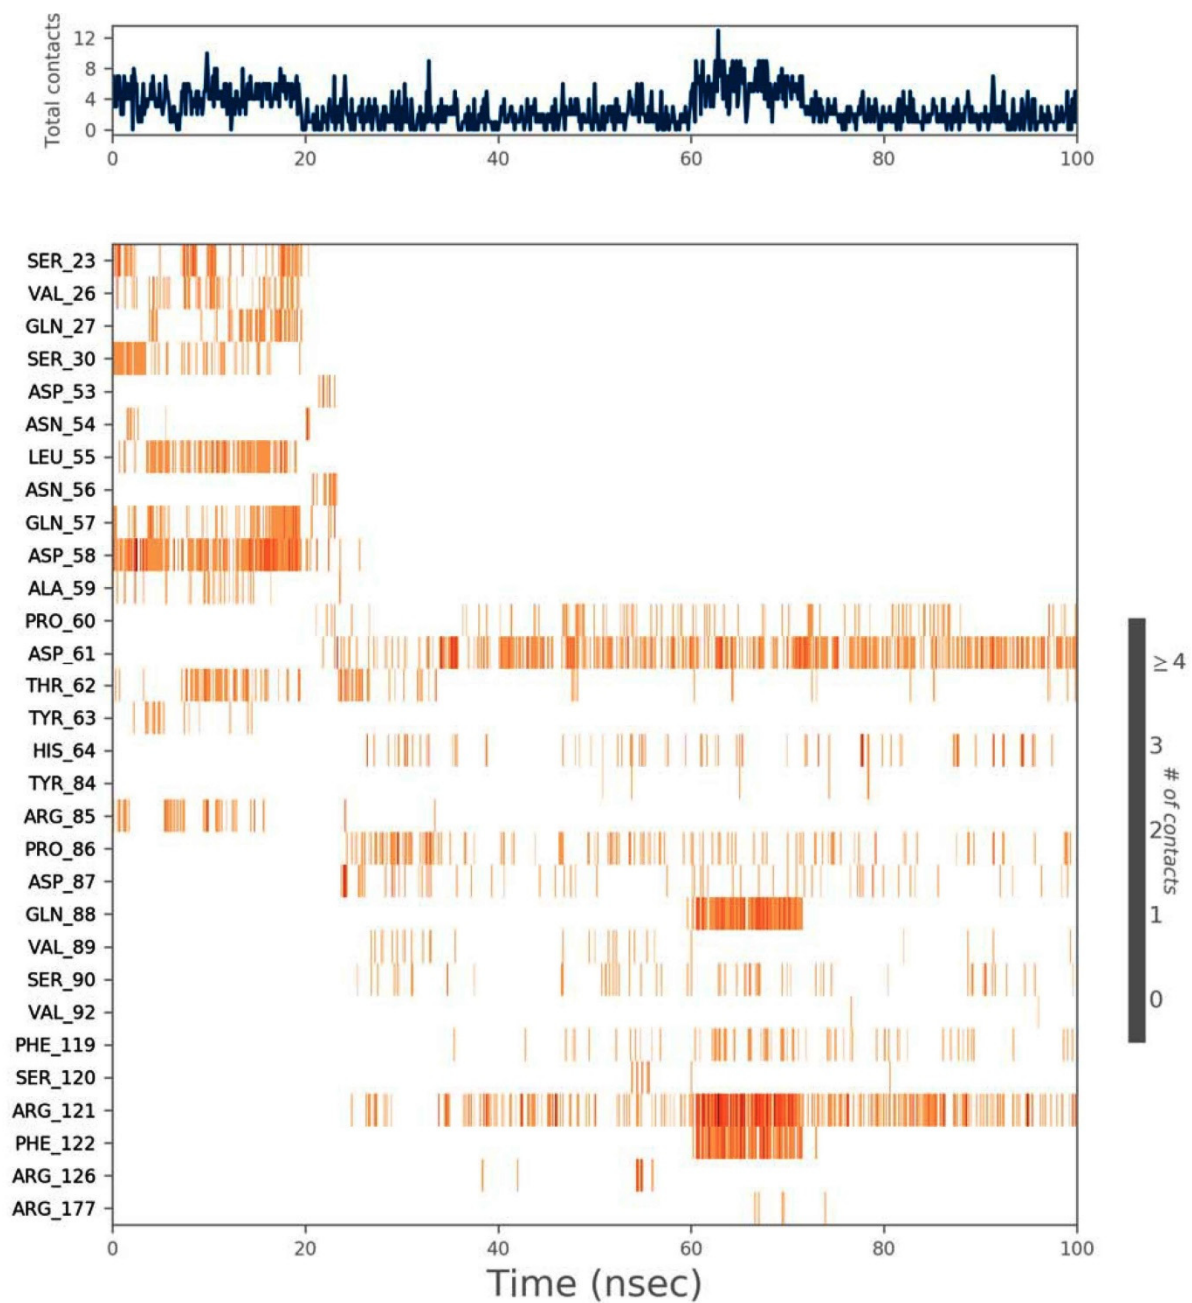

Figure S15. Hydrogen bond interaction stability (consistency) of key residues of the DNaseI protein with tricetin.

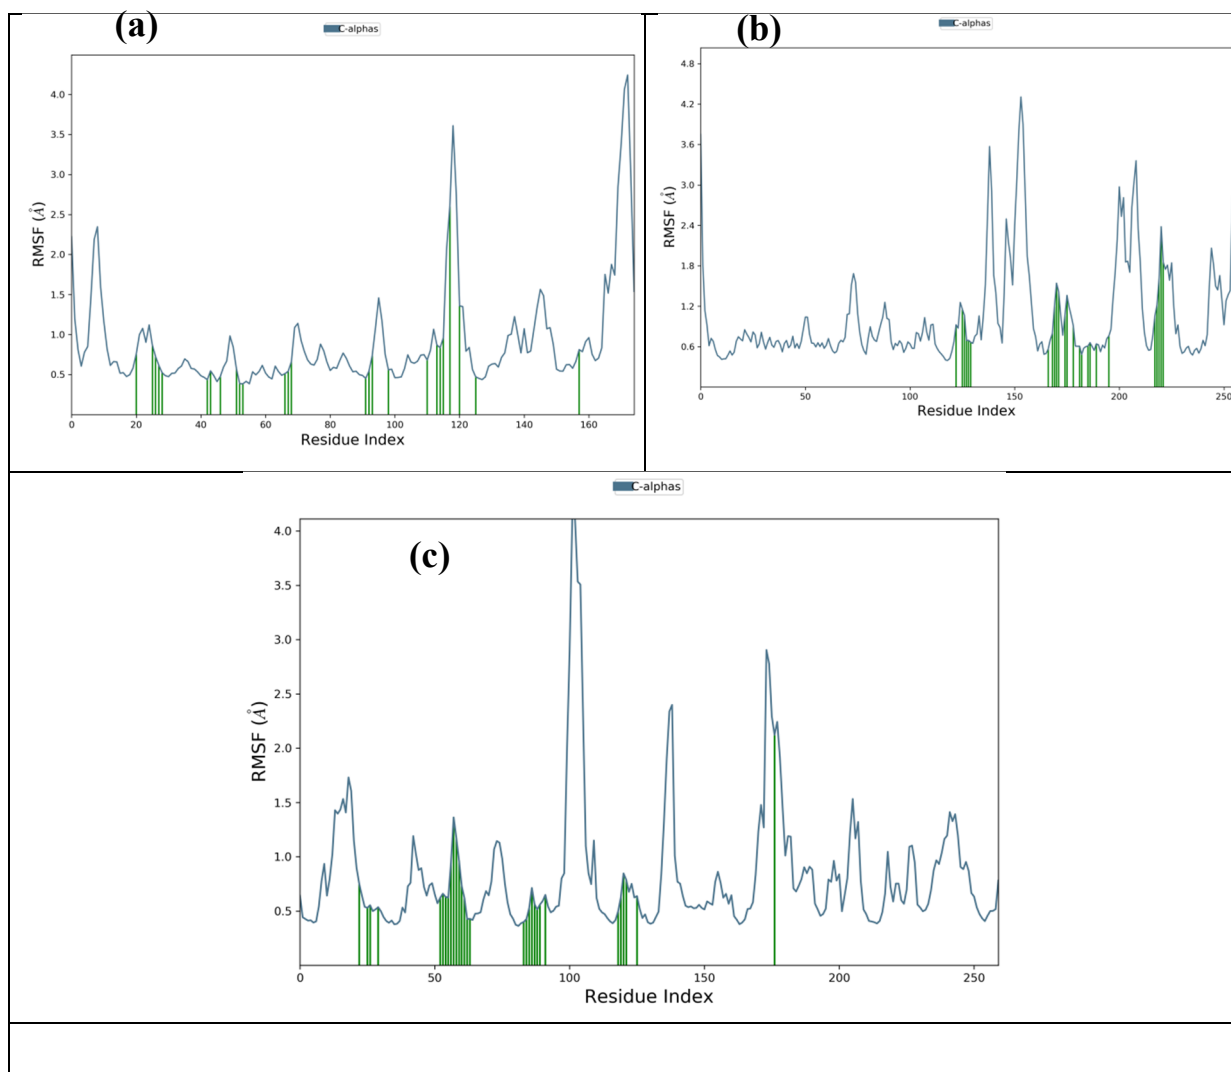

Figure S16. Residue-wise Root Mean Square Fluctuation (RMSF) of protein-ligand complexes during 100 ns. (a) Tricin-SHBG protein; (b) tricin-ADAM17 protein; (c) tricin-DNase I protein. The RMSF of docked protein showed no fluctuation of interacting residues, where green vertical lines represent interacting residues.

Table S1. ADMET screening through pkCSM.

|                     | Myricetin | Malvidin | Rhamnetin | Quercetin | Isorhamnetin | Okanin | Callistephin | kaempferol | Gallic Acid | Rosavin | Esculin | Robinetin | Tricin |
|---------------------|-----------|----------|-----------|-----------|--------------|--------|--------------|------------|-------------|---------|---------|-----------|--------|
| GI absorption       | Low       | High     | High      | High      | High         | High   | Low          | High       | High        | Low     | Low     | High      | High   |
| BBB                 | No        | No       | No        | No        | No           | No     | No           | No         | No          | No      | No      | No        | No     |
| Caco-2 Permeability | 0.095cm/s | -0.381   | -0.361    | -0.229    | -0.003       |        | 0.345        | 0.032      | -0.081      | 0.269   | 0.277   | -0.563    | 0.12   |
| PGS                 | yes       | yes      | No        |           | Yes          | No     | Yes          | Yes        | No          | Yes     | Yes     | Yes       | Yes    |
| PGI                 | No        | No       | No        |           | No           | No     | No           | No         | No          | No      | No      | No        | No     |
| CYP2D6 substrate    | No        | No       | No        | No        | No           | No     | No           | No         | No          | No      | No      | No        | No     |
| CYP3A4 substrate    | No        | No       | No        | No        | No           | No     | No           | No         | No          | No      | No      | No        | No     |
| CYP1A2 inhibitor    | Yes       | Yes      | Yes       | Yes       | Yes          | No     | No           | Yes        | No          | No      | No      | Yes       | Yes    |
| CYP2C19 inhibitor   | No        | No       | No        | No        | No           | No     | No           | No         | No          | No      | No      | No        | Yes    |
| CYP2C9 inhibitor    | No        | No       | No        | No        | No           | No     | No           | No         | No          | No      | No      | No        | No     |
| CYP2D6 inhibitor    | No        | No       | No        | No        | No           | No     | No           | No         | No          | No      | No      | No        | No     |
| CYP3A4 inhibitor    | No        | No       | No        | No        | No           | No     | No           | No         | No          | No      | No      | No        | No     |
| AMES Toxicity       | No        | No       | No        | No        | No           | No     | No           | No         | No          | No      | No      | No        | No     |
| Skin Sensitization  | No        | No       | No        | No        | No           | No     | No           | No         | No          | No      | No      | No        | No     |
| Hepatotoxicity      | No        | No       | No        | No        | No           | No     | No           | No         | No          | No      | No      | No        | No     |

Table S2. Medical biochemistry of drugs.

| Sr. No. |              | SA score (<6 easy to synthesize) | Lipinski Rule | Pfizer Rule | GSK Rule | Golden Triangle |
|---------|--------------|----------------------------------|---------------|-------------|----------|-----------------|
| 1       | Myricetin    | 2.733                            | Accepted      | Accepted    | Accepted | Accepted        |
| 2       | Malvidin     | 2.944                            | Accepted      | Accepted    | Accepted | Accepted        |
| 3       | Rhamnetin    | 2.456                            | Accepted      | Accepted    | Accepted | Accepted        |
| 4       | Quercetin    | 2.545                            | Accepted      | Accepted    | Accepted | Accepted        |
| 5       | Isorhamnetin | 2.453                            | Accepted      | Accepted    | Accepted | Accepted        |
| 7       | Okanin       | 2.392                            | Accepted      | Accepted    | Accepted | Accepted        |
| 11      | Callistephin | 4.139                            | Accepted      | Accepted    | Rejected | Accepted        |
| 12      | Kaempferol   | 2.375                            | Accepted      | Accepted    | Accepted | Accepted        |
| 13      | Gallic Acid  | 2.095                            | Accepted      | Accepted    | Accepted | Accepted        |
| 14      | Moronic acid | 4.653                            | Accepted      | Rejected    | Rejected | Rejected        |
| 15      | Rosavin      | 4.291                            | Accepted      | Accepted    | Rejected | Accepted        |
| 16      | Esculin      | 3.732                            | Accepted      | Accepted    | Accepted | Accepted        |
| 17      | Robinetin    | 2.558                            | Accepted      | Accepted    | Accepted | Accepted        |
| 18      | Tricin       | 2.430                            | Accepted      | Accepted    | Accepted | Accepted        |
